# Supplementary material for: Weekly versus triweekly cisplatin-based concurrent chemoradiotherapy in the treatment of locally advanced cervical carcinoma: An updated meta-analysis based on randomized controlled trials
Source: PubMed Central journal article supplement (PMC6946561; doi:10.1097/md.0000000000018663), 2020-01-03
Supplement: medi-99-e18663-s002.pdf [file medi-99-e18663-s002.pdf]

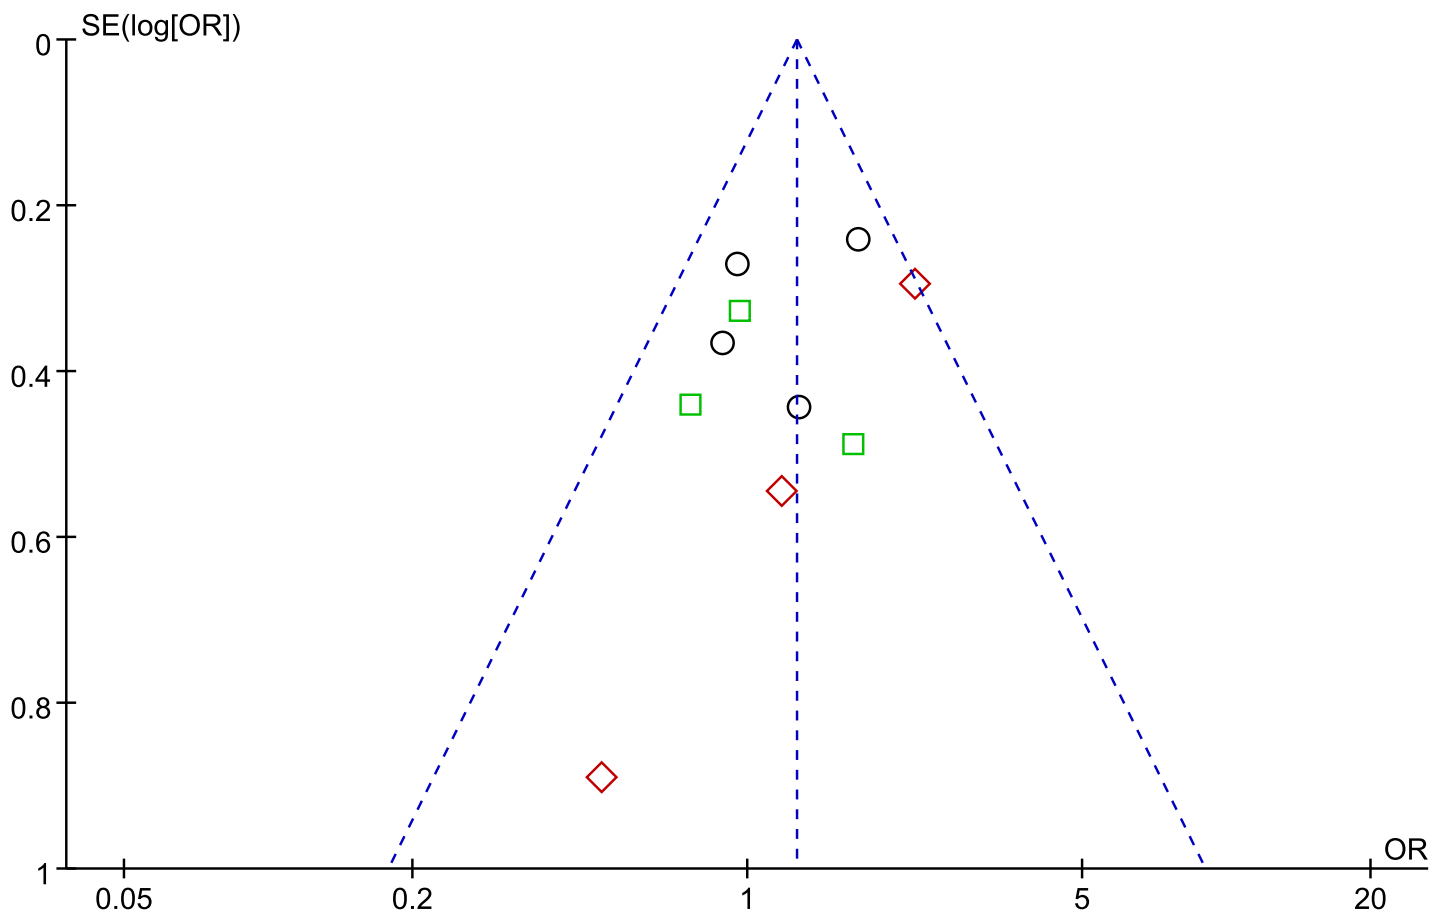

**Subgroups**

- Recurrence 5 Year
- ◇ Recurrence Local 5 Year
- Recurrence Distance 5 Year
